# Supplementary material for: Stereoselective ring-opening polymerization of rac-lactide catalyzed by the proton sponge bisphosphazene 1,8-bis(hexamethyltriaminophosphazenyl)naphthalene
Source: Royal Society of Chemistry journal article supplement (doi:10.1039/d4py00242c), 2024-01-01
Supplement: d4py00242c1.pdf [file d4py00242c1.pdf]

## Supplementary Information for Manuscript Entitled

### Stereoselective ring-opening polymerization of *rac*-lactide catalyzed by proton sponge bisphosphazene of 1,8- bis(hexamethyltriaminophosphazenylnaphthalene

Zhenqing Zhang,<sup>a</sup> Xiaoyu Guo,<sup>a</sup> Xinhui Kou,<sup>b</sup> Na Zhao,<sup>a,\*</sup> and Zhibo Li<sup>a,c,\*</sup>

<sup>a</sup> Key Laboratory of Biobased Polymer Materials, Shandong Provincial Education Department, College of Polymer Science and Engineering, Qingdao University of Science and Technology, Qingdao, Shandong 266042, China

<sup>b</sup> Analyses and Testing Center, Qingdao University of Science and Technology, Qingdao, Shandong 266042, China

<sup>c</sup> College of Chemical Engineering, Qingdao University of Science and Technology, Qingdao, Shandong 266042, China

\*Corresponding Author: E-mail: zhaona@qust.edu.cn; zbli@qust.edu.cn

#### Experimental Section

##### Materials.

Toluene and tetrahydrofuran (THF) were purified by purging with dry nitrogen, followed by passing through columns of activated alumina. *Rac*-LA was purchased from Macklin Inc. and recrystallized twice from toluene. Benzyl alcohol (BnOH), purchased from Shanghai Aladdin Biochemical Technology Co., Ltd, was stirred with CaH<sub>2</sub> at room temperature for 24 hours and distilled under reduced pressure prior to use. Other chemicals were purchased from commercial suppliers and used without further purification unless otherwise noted. HMPN,<sup>1</sup> U-1/U-2/U-3/U-4,<sup>2, 3</sup> and SQ-1/SQ-2<sup>4</sup> were synthesized according to the procedures reported before.

##### General Considerations.

All moisture/oxygen sensitive reactions/compounds were operated using standard

Schlenk technique or glovebox technique in an atmosphere of high-purity nitrogen. Nuclear magnetic resonance (NMR) spectra were recorded on a Bruker AVANCE NEO 400 MHz NMR spectrometer (400 MHz for  $^1\text{H}$  NMR) at 298 K. Chemical shifts were reported in  $\delta$  (ppm) and were referenced to tetramethylsilane (0.00 ppm). Gel permeation chromatography (GPC) experiments were performed on an Agilent HPLC system equipped with a model 1260 Hip degasser, a model 1260 Iso pump and a model 1260 differential refractometer detector with using THF as mobile phase at a flow rate of 1.0 mL/min at 40 °C. One PLgel5  $\mu\text{m}$  guard column and three Mz-Gel SD<sub>plus</sub> columns ( $10^3$  Å,  $10^4$  Å, and  $10^5$  Å, linear range of  $M_w = 1000 - 2 \cdot 10^6$  Da) were connected in series. The molecular weight and dispersity were calculated using polystyrene standards with narrow molecular weight distribution as references. The sample concentration used for GPC analysis was about 5 mg/mL. Matrix-assisted laser desorption/ionization time-of-flight mass spectroscopy (MALDI-TOF MS) analyses were conducted on a Bruker Microflex MALDI-TOF MS spectrometer equipped with a 337 nm nitrogen laser. The polymer was dissolved in THF, and *trans*-2-[3-(4-*tert*-butylphenyl)-2-methyl-2-propenylidene]-malononitrile (DCTB) was used as the matrix and  $\text{CF}_3\text{COONa}$  as the ionization agent. Differential scanning calorimetry (DSC) was performed using a TA differential scanning calorimeter DSC 25 that was calibrated using high purity indium. Measurements were performed under  $\text{N}_2$  atmosphere with a flow rate of 50 mL/min. Each sample with a mass of 5 - 10 mg was used for the measurement.

**General procedure for ROP of *rac*-LA catalyzed by HMPN (Table 1, run 2).**

In a glove-box, HMPN (4.2 mg, 0.01 mmol) and BnOH (1.0  $\mu\text{L}$ , 0.01 mmol) were dissolved in 1 mL of toluene and stirred for 10 min in a Schlenk tube. Then *rac*-LA (144 mg, 1.0 mmol) was added into the mixture to start the polymerization at room temperature (25 °C). After the desired polymerization time, acetic acid was added to quench the reaction and a small part of solution was taken and analyzed by  $^1\text{H}$  NMR to determine the conversion. The conversion of *rac*-LA monomer was calculated based on the integration (I) ratio  $I_{\text{PLA}}/[I_{\text{PLA}} + I_{\text{rac-LA}}]$  of the methine proton, which is at

5.18 ppm for PLA polymer and 4.87 ppm for *rac*-LA monomer. The other solution was poured into cold methanol (100 mL) to precipitate polymer, which was dried in a vacuum oven overnight.

**General procedure for ROP of *rac*-LA catalyzed by HMPN/cocatalyst (Table 2, run 2).**

In a glove-box, *rac*-LA (144 mg, 1.0 mmol) was dissolved in toluene (0.5 mL) in a Schlenk tube. In a second tube, HMPN (4.2 mg, 0.01 mmol), BnOH (1.0  $\mu$ L, 0.01 mmol), U-2 (6.5 mg, 0.03 mmol) were mixed in toluene (0.5 mL) and stirred for 2 min. The latter mixture was then added into *rac*-LA solution to start the polymerization at room temperature (25 °C). After the desired polymerization time, acetic acid was added to quench the reaction and a small part of solution was taken and analysed by  $^1\text{H}$  NMR to determine the conversion.

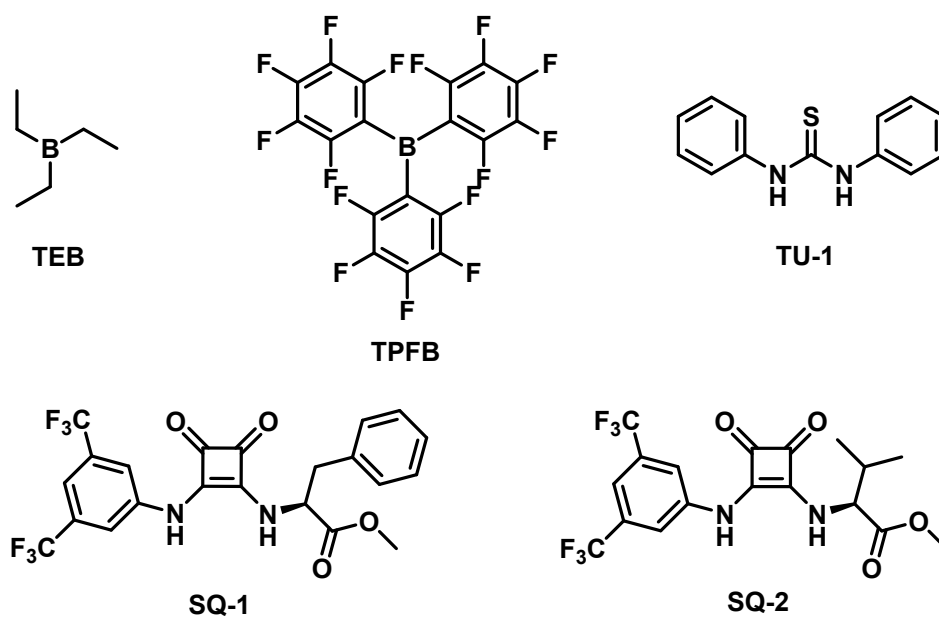

**Scheme S1.** Chemical structures of the cocatalysts

**Table S1.** ROP of *rac*-LA catalyzed by binary catalytic system<sup>a</sup>

| run | M/B/I/C <sup>b</sup> | Cocatalyst | Solvent | Time<br>(min) | Conv. <sup>c</sup><br>(%) | $M_n^d$<br>(kg/mol) | $\bar{D}^d$ | $P_m^e$ |
|-----|----------------------|------------|---------|---------------|---------------------------|---------------------|-------------|---------|
| 1   | 100/1/1/2            | TEB        | Toluene | 60            | 95                        | 3.1                 | 1.26        | 0.66    |
| 2   | 100/1/1/1            | TPFB       | Toluene | 720           | 0                         | n.d.                | n.d.        | n.d.    |
| 3   | 100/1/1/3            | SQ-1       | THF     | 20            | 8                         | 21.6                | 1.36        | 0.67    |
| 4   | 100/1/1/3            | SQ-2       | THF     | 20            | 5                         | 22.0                | 1.33        | 0.68    |
| 5   | 100/1/1/3            | TU-1       | toluene | 10            | 88                        | 21.2                | 1.09        | 0.76    |

<sup>a</sup>Conditions:  $[rac\text{-LA}]_0 = 1.0$  mol/L, the polymerizations were carried out at room temperature using HMPN as catalyst. <sup>b</sup>M/B/I/C indicates the mole ratio of  $[rac\text{-LA}]_0/[HMPN]_0/[BnOH]_0/[cocatalyst]_0$ . <sup>c</sup>Determined by <sup>1</sup>H-NMR. <sup>d</sup>Determined by GPC at 40 °C in THF using standard polystyrene as a reference. <sup>e</sup>Determined by homonuclear decoupled <sup>1</sup>H NMR spectroscopy of purified polymers.

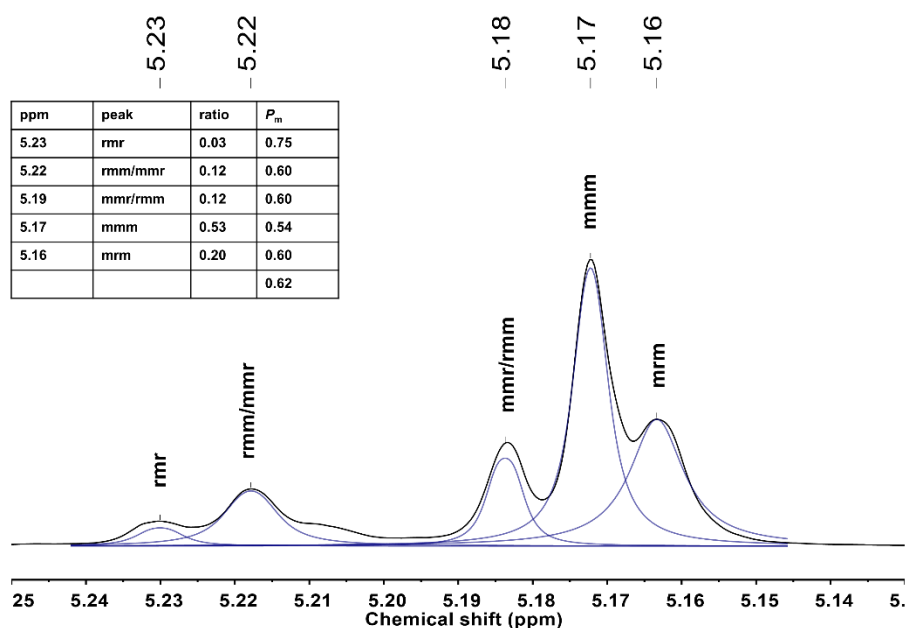**Figure S1.** Homonuclear decoupled <sup>1</sup>H NMR spectrum of PLA sample (Table 1, run 1).

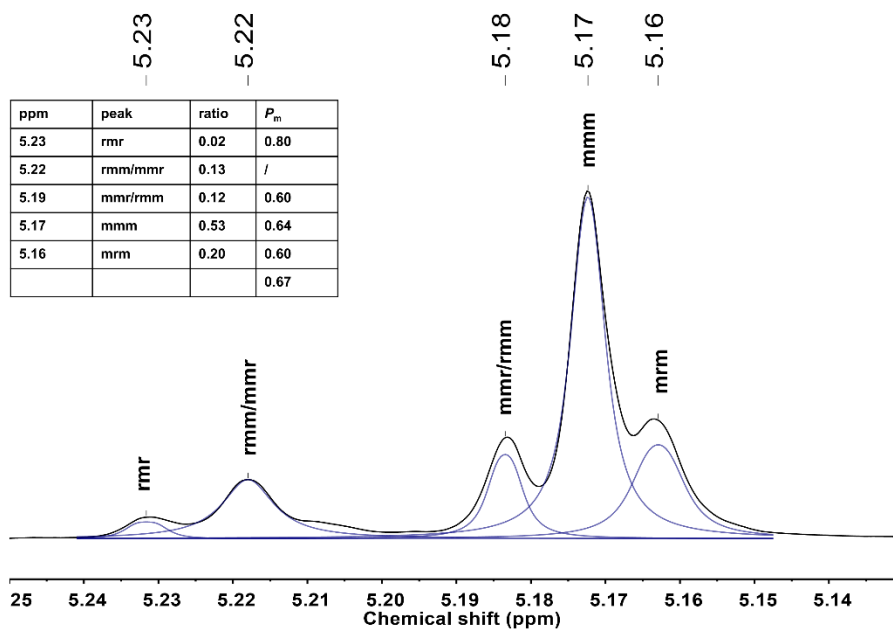

**Figure S2.** Homonuclear decoupled  $^1\text{H}$  NMR spectrum of PLA sample (Table 1, run 2).

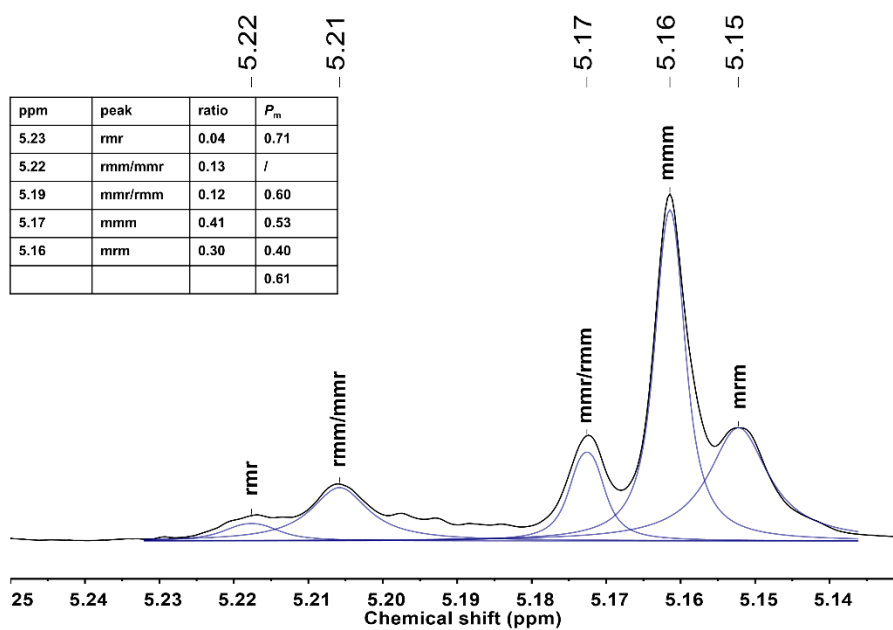

**Figure S3.** Homonuclear decoupled  $^1\text{H}$  NMR spectrum of PLA sample (Table 1, run 3).

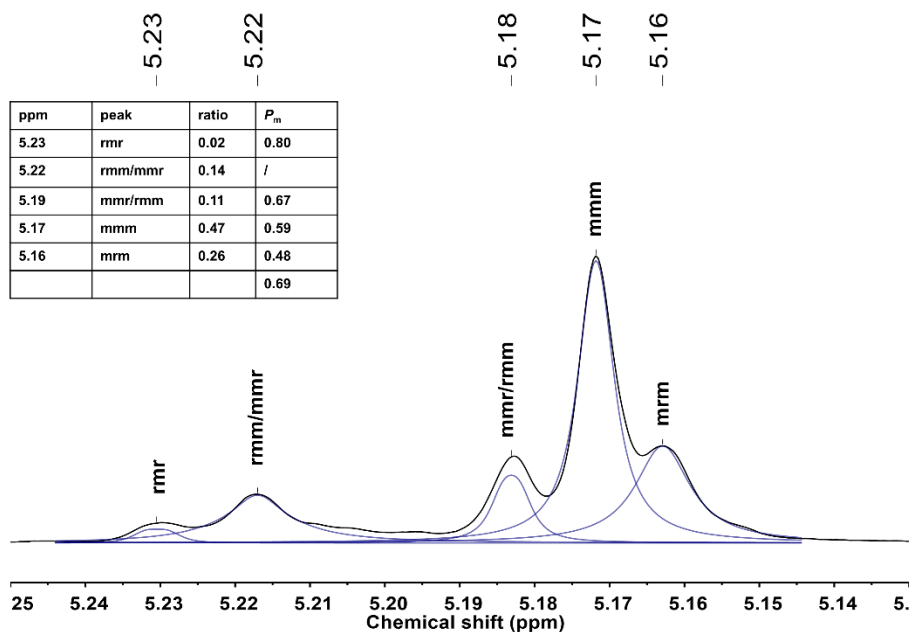

**Figure S4.** Homuncular decoupled  $^1\text{H}$  NMR spectrum of PLA sample (Table 1, run 4).

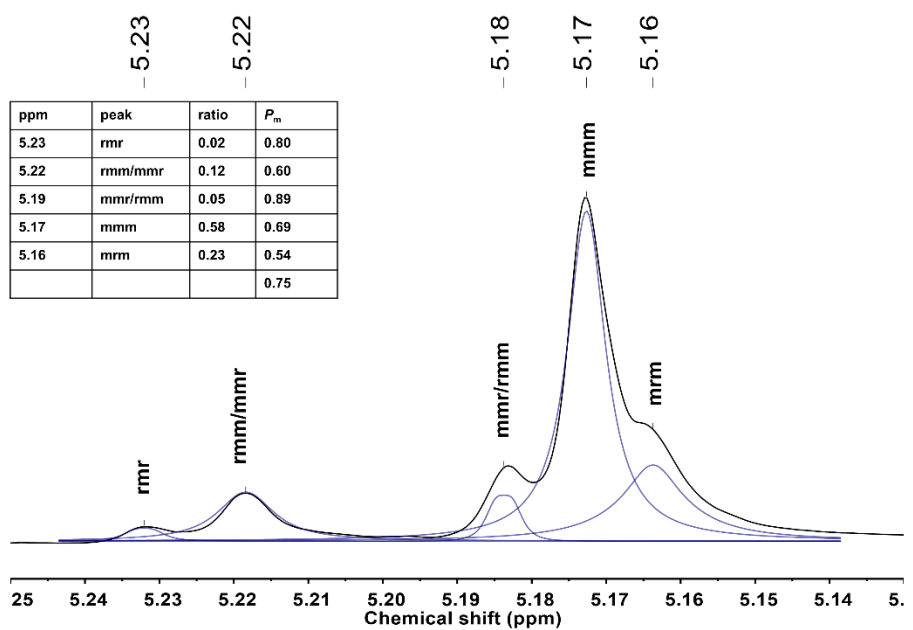

**Figure S5.** Homuncular decoupled  $^1\text{H}$  NMR spectrum of PLA sample (Table 1, run 5).

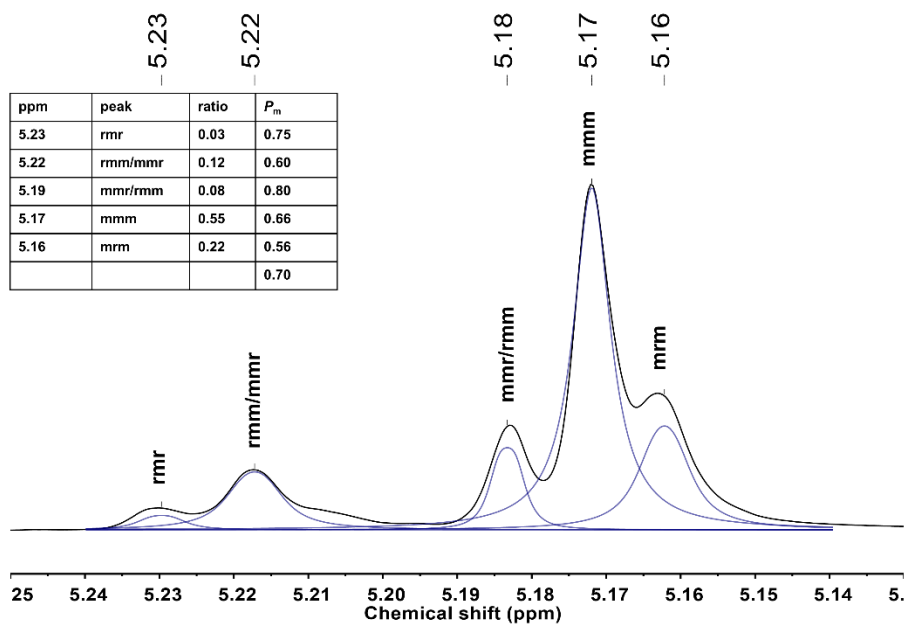

**Figure S6.** Homuncular decoupled  $^1\text{H}$  NMR spectrum of PLA sample (Table 1, run 7).

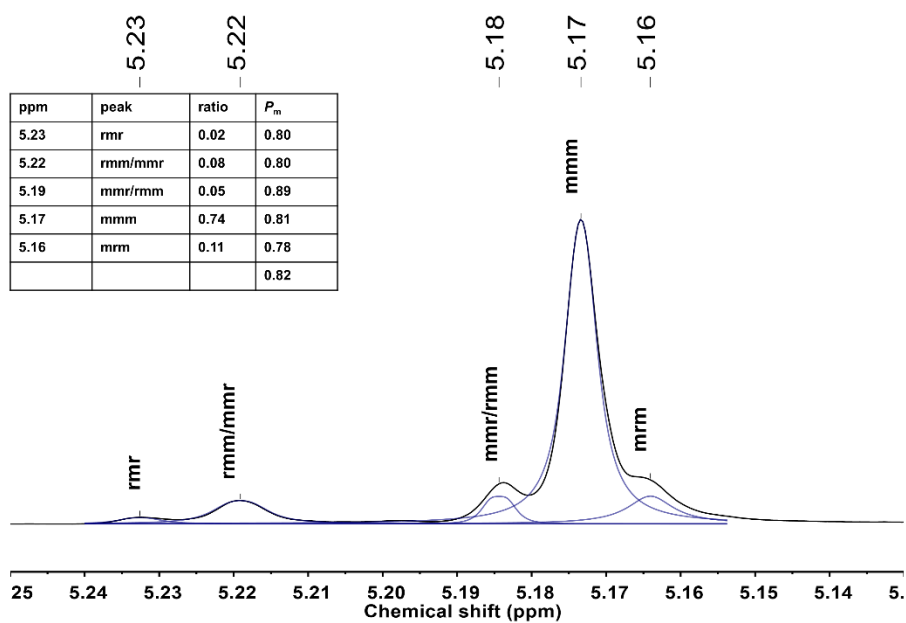

**Figure S7.** Homuncular decoupled  $^1\text{H}$  NMR spectrum of PLA sample (Table 1, run 8).

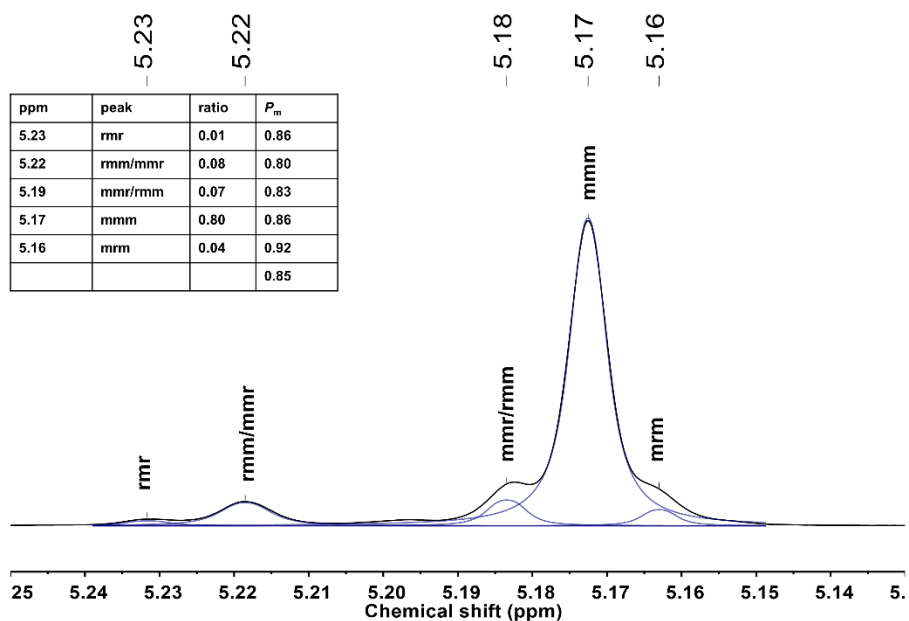

**Figure S8.** Homounuclear decoupled  $^1\text{H}$  NMR spectrum of PLA sample (Table 1, run 9).

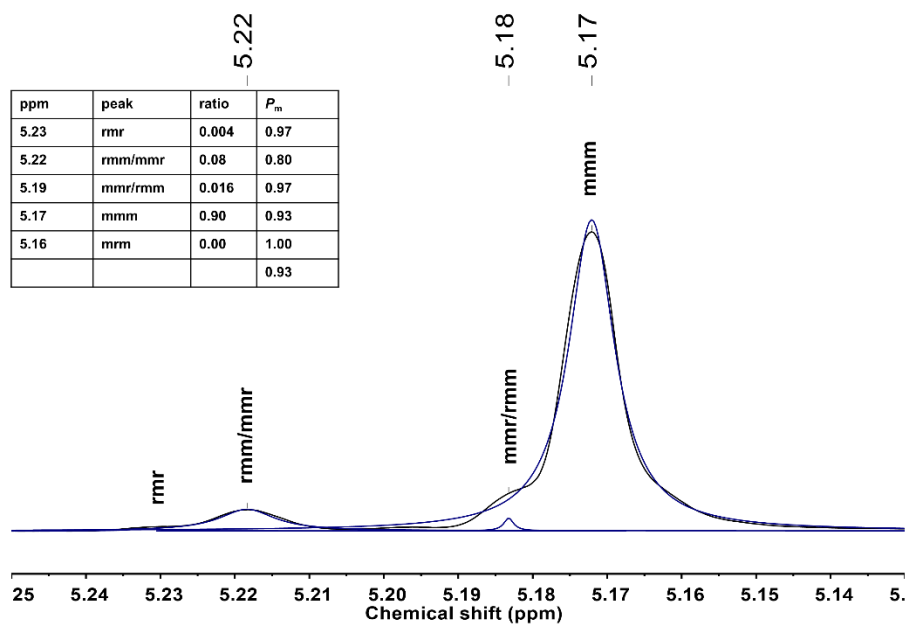

**Figure S9.** Homounuclear decoupled  $^1\text{H}$  NMR spectrum of PLA sample (Table 1, run 10).



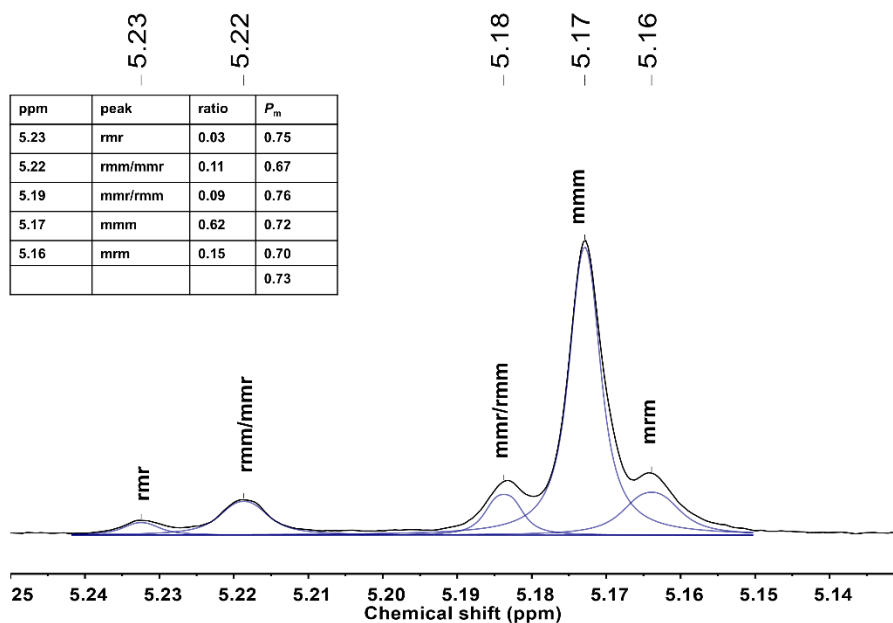

**Figure S10.** Homuncular decoupled  $^1\text{H}$  NMR spectrum of PLA sample (Table 2, run 1).

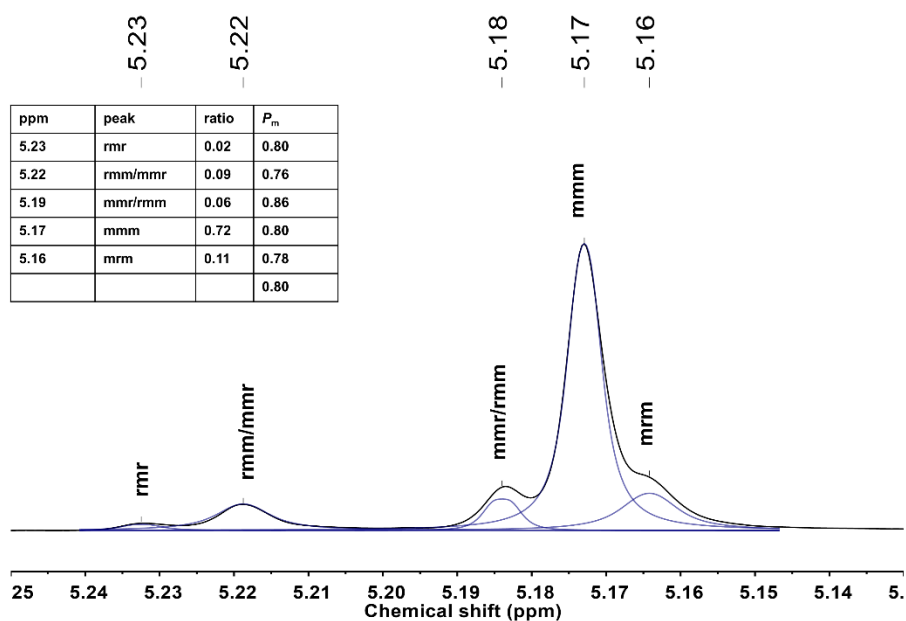

**Figure S11.** Homuncular decoupled  $^1\text{H}$  NMR spectrum of PLA sample (Table 2, run 2).

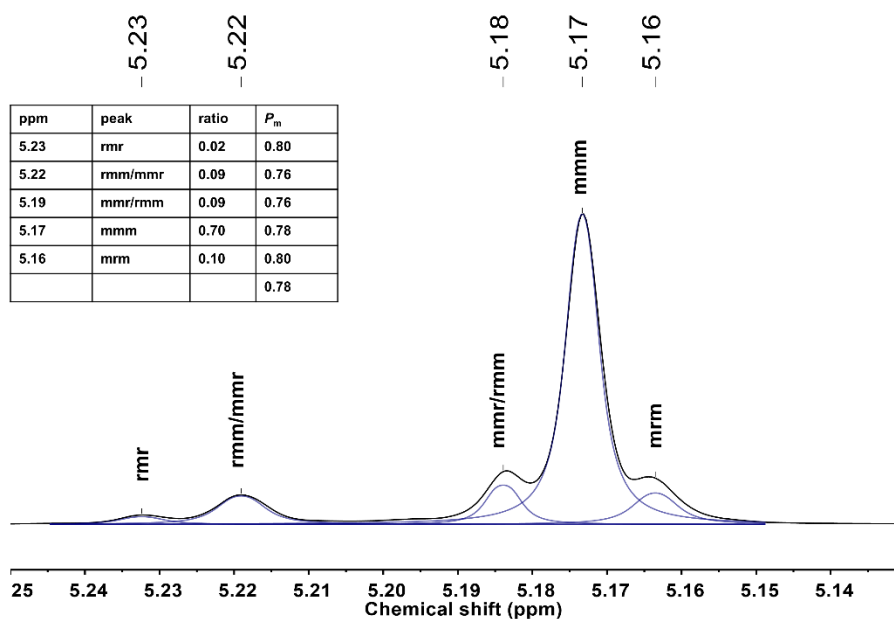

**Figure S12.** Homuncular decoupled  $^1\text{H}$  NMR spectrum of PLA sample (Table 2, run 3).

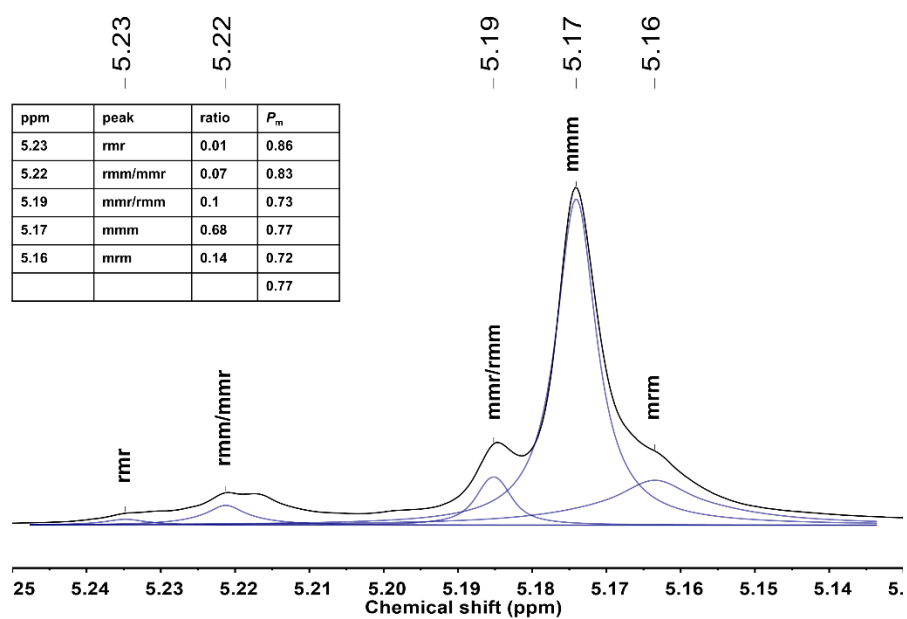

**Figure S13.** Homuncular decoupled  $^1\text{H}$  NMR spectrum of PLA sample (Table 2, run 4).

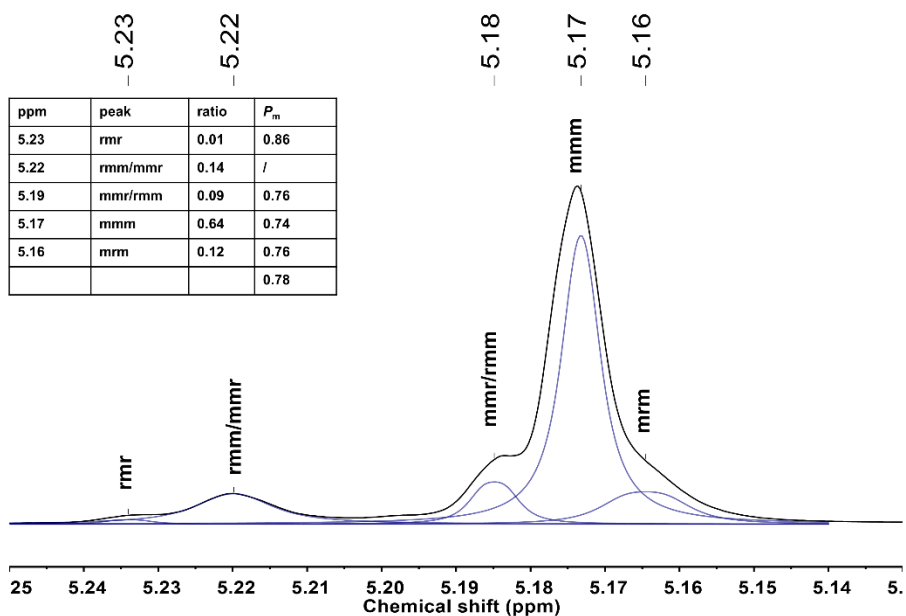

**Figure S14.** Homuncular decoupled  $^1\text{H}$  NMR spectrum of PLA sample (Table 2, run 5).

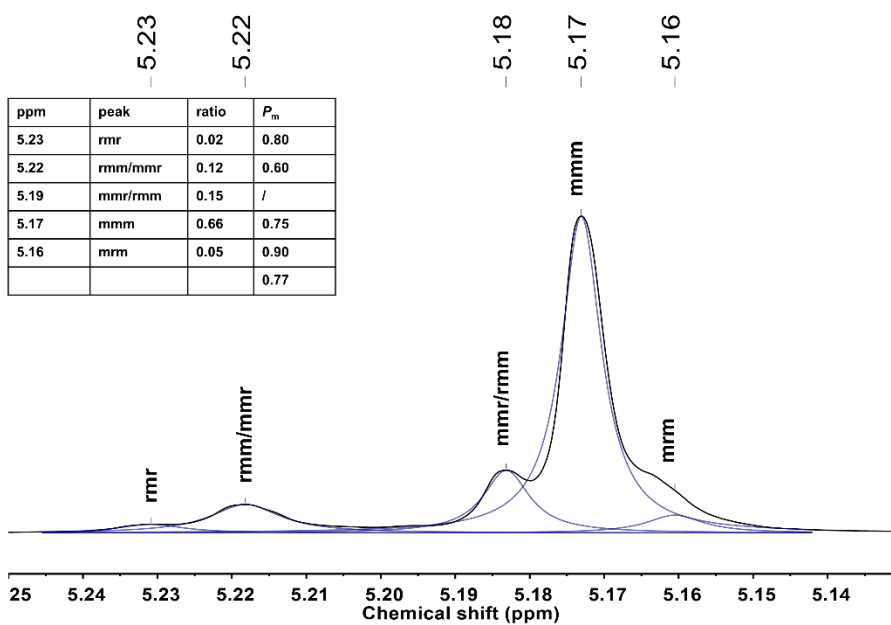

**Figure S15.** Homuncular decoupled  $^1\text{H}$  NMR spectrum of PLA sample (Table 2, run 6).

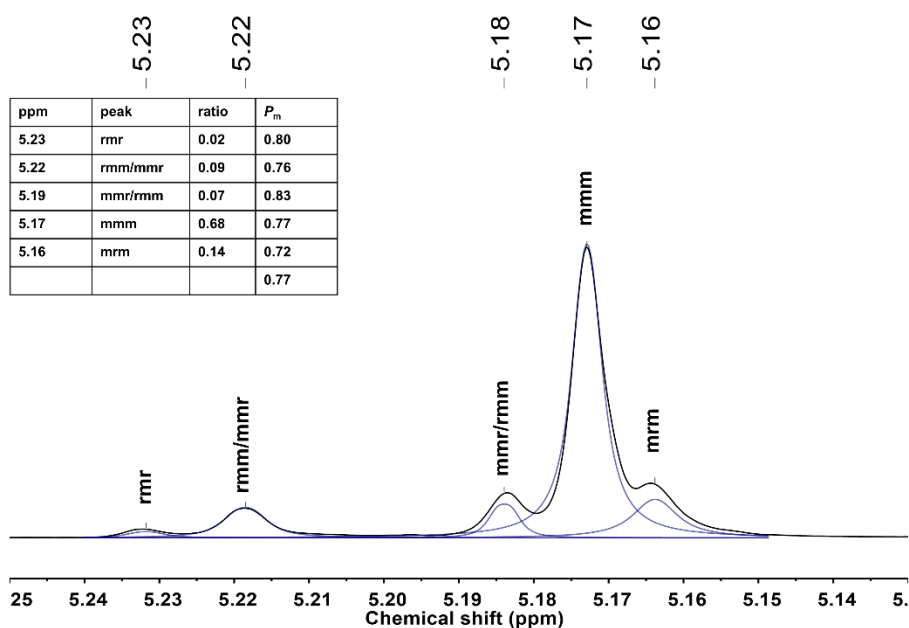

**Figure S16.** Homonuclear decoupled  $^1\text{H}$  NMR spectrum of PLA sample (Table 2, run 7).

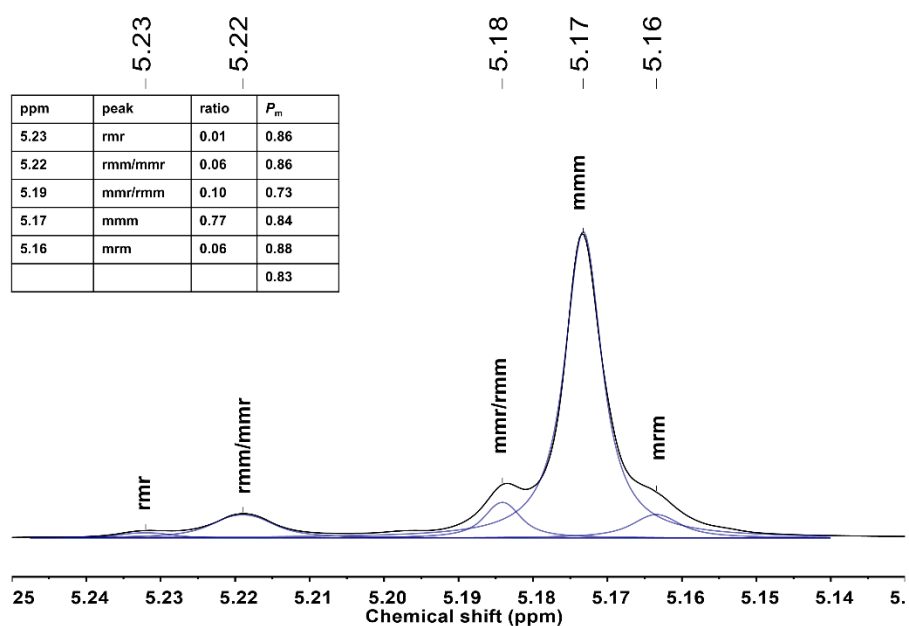

**Figure S17.** Homonuclear decoupled  $^1\text{H}$  NMR spectrum of PLA sample (Table 2, run 8).

## References

1. Kogel, J. F.; Oelkers, B.; Kovacevic, B.; Sundermeyer, J., A new synthetic pathway to the second and third generation of superbasic bisphosphazene proton sponges: the run for the best chelating ligand for a proton. *J. Am. Chem. Soc.* **2013**,

135 (47), 17768-74.

2. Lin, B.; Waymouth, R. M., Urea Anions: Simple, Fast, and Selective Catalysts for Ring-Opening Polymerizations. *J. Am. Chem. Soc.* **2017**, *139* (4), 1645-1652.
3. Shen, Y.; Xiong, W.; Li, Y.; Zhao, Z.; Lu, H.; Li, Z., Chemoselective Polymerization of Fully Biorenewable  $\alpha$ -Methylene- $\gamma$ -Butyrolactone Using Organophosphazene/Urea Binary Catalysts Toward Sustainable Polyesters. *CCS Chem.* **2021**, *3* (1), 620-630.
4. Jiang, X.; Zhao, N.; Li, Z., Stereoselective Ring-Opening Polymerization of rac-Lactide Catalyzed by Squaramide Derived Organocatalysts at Room Temperature. *Chin. J. Chem.* **2021**, *39* (9), 2403-2409.
